# Supplementary material
Source: PubMed Central journal article supplement (PMC5278163)
Supplement: IAI.00530-16_zii999091961s1.pdf [file IAI.00530-16_zii999091961s1.pdf]

Figure S1

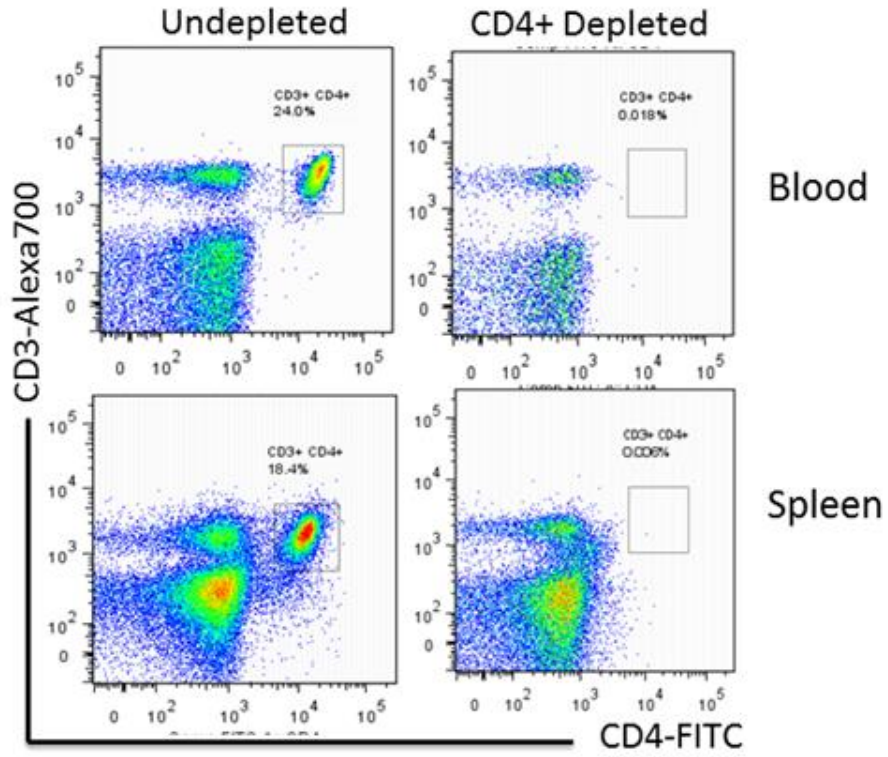

Figure S2

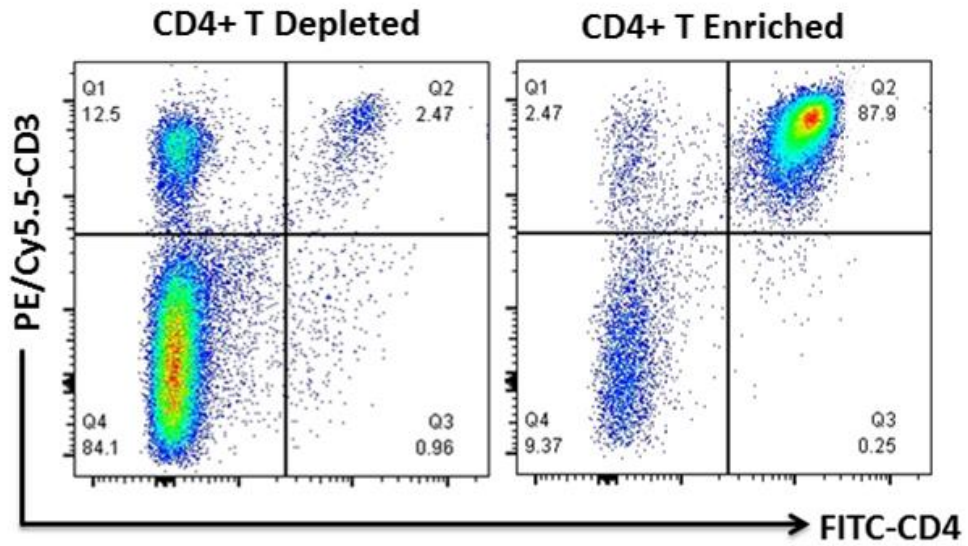

**Figure S3**

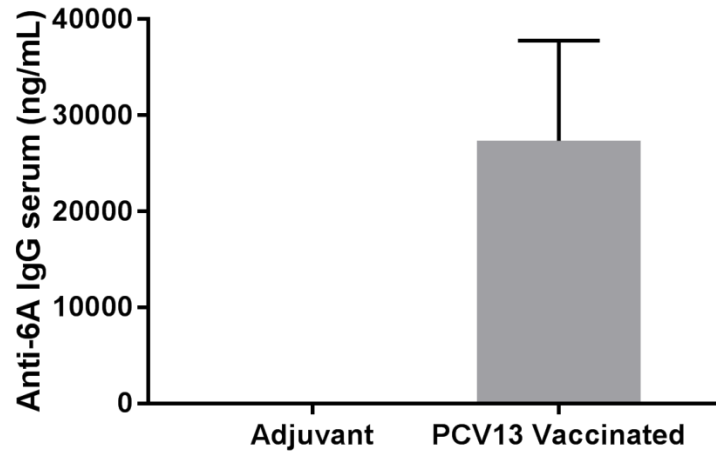

**Figure S1:** Mice were intraperitoneally injected with 200  $\mu$ g of 1 anti CD4 antibody with a subsequent booster of 50  $\mu$ g anti CD4 antibody 3 days later. Spleens and blood were screened for CD4 T cells using anti CD3 and CD4 antibodies. Representative flow cytometry plots of spleens and blood from naïve mice. The same procedure was applied to PhtD vaccinated or adjuvant control mice.

**Figure S2:** CD4<sup>+</sup> T cells from PhtD vaccinated or adjuvant control were magnetically purified and purity was assessed by flow cytometry by using antibodies against CD4 (FITC) and CD3 (PE/Cy5.5).

**Fig S3:** Anti-6A (*Spn*) serum IgG titers in adjuvant control and PCV13 vaccinated mice.
